# Supplementary material for: Fire needle for the moderate obstructive sleep apnea hypopnea ayndrome(OSAHS): study protocol for a multicenter randomized controlled trial
Source: Research Square preprint supplement (doi:10.21203/rs.3.rs-2552641/v1), 2023-02-23
Supplement: Supplementary file 2 [file ecc15ea478b125b753f9b0cd.pdf]

## 伦理审查批件

审批号：LL2022-ST09

|                                                                                                                                                                                                                                |                              |          |            |
|--------------------------------------------------------------------------------------------------------------------------------------------------------------------------------------------------------------------------------|------------------------------|----------|------------|
| 项目名称                                                                                                                                                                                                                           | 火针治疗中度睡眠呼吸暂停低通气综合征的随机对照研究    |          |            |
| 项目来源（申报）                                                                                                                                                                                                                       | 2022年“首都临床特色诊疗技术研究及转化应用”专项课题 |          |            |
| 项目编号                                                                                                                                                                                                                           | 2022-ST09                    | 主要研究/负责人 | 付渊博        |
| 审查类别                                                                                                                                                                                                                           | 复审                           | 审查方式     | 快速审查       |
| 审查日期                                                                                                                                                                                                                           | 2022年12月6日                   | 审查地点     | 北京市怀柔区中医医院 |
| 审查文件                                                                                                                                                                                                                           | 科研项目伦理申请书                    |          |            |
| <p>根据卫生部《涉及人的生物医学研究伦理审查办法》(2016)、《药物临床试验伦理审查工作指导原则》(2010年)、国家中医药管理局《中医药临床伦理审查管理规范》(2010)、《药物临床试验质量管理规范》(2003年)、《医疗器械临床试验质量管理规范》(2016年)、《赫尔辛基宣言》、CIOMS《设计人的生物医学研究国际伦理指南》等的伦理原则，经北京中医医院怀柔医院医学伦理委员会审查，该项目的研究方案基本符合科学性与伦理学的要求。</p> |                              |          |            |
|  <p>伦理委员会盖章</p> <p>2022 年 12 月 6 日</p>                                                                                                    |                              |          |            |
